# Supplementary material for: Predicting the strain-mediated topological phase transition in 3D cubic ThTaN3
Source: publisher site journal article supplement (doi:10.3762/bjnano.9.132), 2018-05-11
Supplement: Additional file 1 [file 2190-4286-9-132-S1.pdf]

# Supporting Information

for

## **Predicting the strain-mediated topological phase transition in 3D cubic ThTaN<sub>3</sub>**

Chunmei Zhang and Aijun Du\*

Address: <sup>1</sup>School of Chemistry, Physics and Mechanical Engineering, Queensland University of Technology,  
Gardens Point Campus, QLD 4001, Brisbane, Australia

\*Corresponding author

Email: [aijun.du@qut.edu.au](mailto:aijun.du@qut.edu.au) - Aijun Du

### **Additional calculations**

Table S1: Lattice parameters of ThTaN<sub>3</sub> under strain.

|                                | -8%  | -5%  | -3%  | 0    | 3    | 5    | 7    |
|--------------------------------|------|------|------|------|------|------|------|
| Lattice parameters (Å) (a=b=c) | 3.69 | 3.81 | 3.89 | 4.01 | 4.13 | 4.21 | 4.29 |

## Calculation of $Z_2$

In order to determine topological features, we used the parity criteria [S1] to calculate the  $Z_2$  topological index. The  $Z_2$  index is determined by the parity of occupied bands on each time-reversal invariant momentum. In this strategy, the  $Z_2$  invariant is defined by

$$(-1)^{\nu} = \prod_i \delta_i = -1$$

$$\delta_i = \prod_{m=1}^N \varepsilon_{2m}(\Gamma_i)$$

For  $2N$  occupied bands,  $\varepsilon_{2m}(\Gamma_i) = \pm 1$  is the parity eigenvalue of the  $2m$ -th occupied energy bands at the time-reversal invariant momentum  $\Gamma_i$ . With the inversion symmetry, the  $Z_2$  topological invariants can be deduced from the knowledge of the parities of the eight time-reversal and parity invariant points at Brillion (BZ). This provides a simple method for determining the topological phases of the lattices with inversion symmetry, without having to know about the global properties of the energy bands.

For the ThTaN<sub>3</sub> compound, the eight time reversal invariant momenta are (0,0,0), (0,5,0,0), (0,0.5,0), (0,0,0.5), (0.5,0.5,0), (0.5,0,0.5), (0,0.5,0.5), (0.5,0.5,0.5) in BZ, as shown in Table S2. The parties of a band at the eight time-reversal momenta is determined from the corresponding electron wavefunctions given by first-principle calculations using the Quantum ESPRESSO package [S2].

Table S2: The valence band parity at the eight time reversal invariant momenta for ThTaN<sub>3</sub> under 8% compressive strain.

| valence band parity | $\Gamma(0,0,0)$ | X(0.5,0,0)<br>=(0, 0.5, 0)<br>=(0, 0, 0.5) | M(0.5,0.5,0)<br>=(0.5,0,0.5)<br>=(0,0.5,0.5) | R(0.5,0.5,0.5) |
|---------------------|-----------------|--------------------------------------------|----------------------------------------------|----------------|
| 1                   | +               | -                                          | +                                            | +              |
| 2                   | +               | -                                          | -                                            | +              |
| 3                   | +               | +                                          | -                                            | +              |
| 4                   | -               | -                                          | +                                            | -              |
| 5                   | -               | +                                          | +                                            | -              |
| 6                   | -               | +                                          | +                                            | -              |
| 7                   | -               | +                                          | +                                            | -              |
| 8                   | -               | -                                          | +                                            | -              |
| 9                   | -               | -                                          | -                                            | -              |
| 10                  | +               | +                                          | -                                            | -              |
| 11                  | +               | +                                          | -                                            | -              |
| 12                  | +               | +                                          | +                                            | -              |
| $\delta_i$          | +1              | $(-1)^3$                                   | $(-1)^3$                                     | -1             |

For this system, the four independent  $Z_2$  invariants [S3] are  $1;(0,0,0)$  with  $\nu_0 = 1$ , thus, ThTaN<sub>3</sub> is a strong topological insulator under 8% compressive strain.

## Surface state

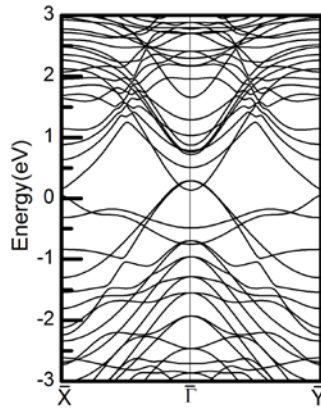

Figure S1: The (001) surface state of ThTaN<sub>3</sub>, which can be clearly seen around  $\Gamma$  point. The high-symmetry points  $\bar{X}$ ,  $\bar{\Gamma}$ , and  $\bar{Y}$  of the surface Brillouin zone are labelled.

It should be noted that there are supposed to have two Dirac cones at the Fermi surface, but the shape as shown in Figure S1 is somewhat parabolic. This is mainly attributed to that a five-layer ( $\sim 20\text{\AA}$ ) surface model (too thin) is adopted for the surface state calculation due to the limitation of our current computational capability.

## References

- S1. Fu, L.; Kane, C. L. *Phys. Rev. B* **2007**, 76, 045302.
- S2. Giannozzi, P. *J. Phys.: Condens. Matter* **2009**, 21, 395502.
- S3. Moore, J. E.; Balents, L. *Phys. Rev. B* **2007**, 75, 121306.
